# Supplementary material for: Depletion of highly abundant proteins from human cerebrospinal fluid: a cautionary note
Source: Springer Nature journal article supplement (doi:10.1186/s13024-015-0050-7), 2015-10-15
Supplement: MOESM2 [file 9776500]

**Title:** Depletion of highly abundant proteins from human cerebrospinal fluid: a cautionary note

**Journal:** Molecular Neurodegeneration

**Authors:** Ramona Günther, Eberhard Krause, Michael Schümann, Ingolf E. Blasig,  
Reiner F. Haseloff

**Corresponding author:** Reiner F. Haseloff, Leibniz Institute of Molecular Pharmacology,  
Robert-Roessle-Str. 10, D-13125 Berlin, Germany; email, [haseloff@fmp-berlin.de](mailto:haseloff@fmp-berlin.de)

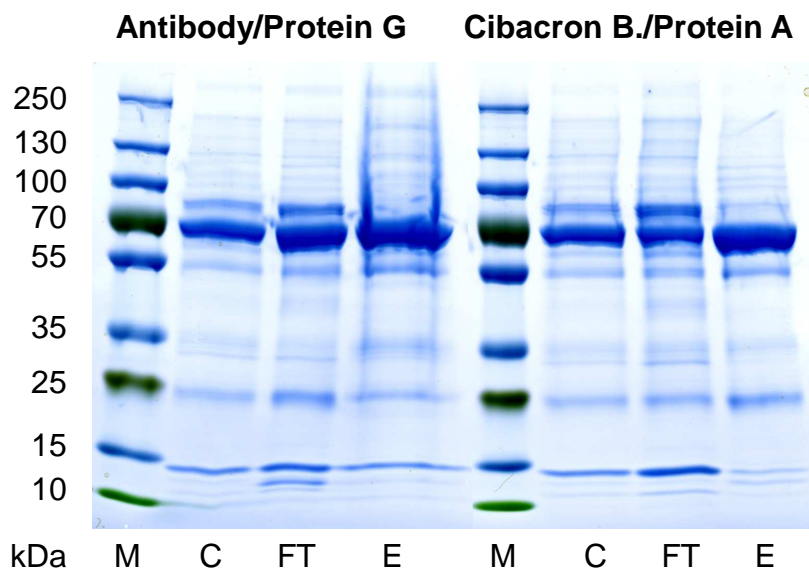

**Supplementary Figure 1:** Protein fractions obtained by depletion of human cerebrospinal fluid (CSF), separated by sodium dodecyl sulphate gel electrophoresis and stained by Coomassie Brilliant Blue G250. (Protein marker, M; CSF undepleted, C; depleted (=flow-through) fraction, FT; column-bound (=eluate) fraction, E); protein load, 5 µg/lane
