# Supplementary material for: Depletion of highly abundant proteins from human cerebrospinal fluid: a cautionary note
Source: Springer Nature journal article supplement (doi:10.1186/s13024-015-0050-7), 2015-10-15
Supplement: MOESM3 [file 9776500]

**Title:** Depletion of highly abundant proteins from human cerebrospinal fluid: a cautionary note

**Journal:** Molecular Neurodegeneration

**Authors:** Ramona Günther, Eberhard Krause, Michael Schümann, Ingolf E. Blasig, Reiner F. Haseloff

**Corresponding author:** Reiner F. Haseloff, Leibniz Institute of Molecular Pharmacology, Robert-Roessle-Str. 10, D-13125 Berlin, Germany;  
email, [haseloff@fmp-berlin.de](mailto:haseloff@fmp-berlin.de)

Supplementary Table 1: Proteins co-depleted in eluate/flow-through fractions obtained by Cibacron Blue/Protein A-based albumin/Ig depletion of human cerebrospinal fluid

| <b>Protein</b>                                     | <b>Accession</b> | <b>Score</b> | <b>Mass (Da)</b> | <b>R</b>   | <b>Reference</b> |
|----------------------------------------------------|------------------|--------------|------------------|------------|------------------|
| Ig lambda chain V-IV region Hil                    | sp P01717        | 64           | 11510            | 1291360.45 |                  |
| Junction plakoglobin                               | sp P14923        | 225          | 81693            | 787005.00  | [1]              |
| Ig heavy chain V-III region GAL                    | sp P01781        | 295          | 12722            | 149151.86  |                  |
| Ig heavy chain V-III region VH26                   | sp P01764        | 434          | 12574            | 119590.67  |                  |
| Ig heavy chain V-III region BUT                    | sp P01767        | 512          | 12371            | 32686.84   |                  |
| Complement component C7                            | sp P10643        | 1425         | 93457            | 9479.54    | [2]              |
| Vitamin K-dependent protein S                      | sp P07225        | 535          | 75074            | 8261.41    |                  |
| Ig heavy chain V-II region NEWM                    | sp P01825        | 320          | 12782            | 4190.77    |                  |
| Complement C5                                      | sp P01031        | 387          | 188186           | 3245.50    | [2]              |
| Plasminogen                                        | sp P00747        | 1173         | 90510            | 2374.78    | [3]              |
| Colony-stimulating factor 1 receptor               | tr E9PEK4        | 601          | 74222            | 2364.82    | [4]              |
| Ectonucleotide pyrophosphatase/phosphodiesterase 2 | tr E7EUF1        | 1573         | 101488           | 1824.75    | [2]              |

|                                              |             |      |        |         |          |
|----------------------------------------------|-------------|------|--------|---------|----------|
| Ig lambda-2 chain C regions                  | sp P0CG05   | 985  | 11287  | 1822.29 |          |
| Immunoglobulin lambda-like polypeptide 5     | sp B9A064   | 797  | 23049  | 1675.48 |          |
| Ig kappa chain V-IV region Len               | sp P01625   | 235  | 12632  | 1637.05 |          |
| Interleukin-6 receptor subunit beta          | sp P40189   | 106  | 96216  | 1575.19 | [5]      |
| Alpha-2-macroglobulin                        | sp P01023   | 8149 | 164837 | 1414.75 | [2], [6] |
| Coagulation factor V                         | sp P12259   | 152  | 251546 | 1193.43 | [2]      |
| Ig lambda chain V-III region LOI             | sp P80748   | 164  | 11928  | 758.40  |          |
| Complement factor B                          | tr B4E1Z4   | 2063 | 140853 | 661.01  | [6]      |
| Complement C1r subcomponent                  | sp P00736   | 985  | 80067  | 502.98  | [2]      |
| Gelsolin                                     | sp P06396   | 2367 | 85644  | 395.63  | [6,7]    |
| Ig gamma-4 chain C region                    | sp P01861   | 1067 | 35918  | 327.77  |          |
| Receptor-type tyrosine-protein phosphatase S | sp Q13332   | 323  | 217041 | 314.10  | [8]      |
| Ig gamma-3 chain C region                    | sp P01860   | 1071 | 41260  | 310.03  |          |
| Isoform 2 of amyloid-like protein 1          | sp P51693-2 | 713  | 72202  | 308.88  | [6,9]    |
| Ig gamma-1 chain C region                    | sp P01857   | 1575 | 36083  | 292.89  |          |
| Fibulin-1                                    | sp P23142   | 1138 | 77162  | 281.56  | [2]      |
| Complement C2                                | sp P06681   | 662  | 83214  | 265.89  | [6,9]    |
| Fibulin 2                                    | tr F5H1F3   | 77   | 129370 | 238.93  | [10]     |
| Complement factor H                          | sp P08603   | 2007 | 139005 | 230.17  | [11]     |
| Ig lambda chain V-I region HA                | sp P01700   | 156  | 11889  | 182.16  |          |
| Neurexin-2-alpha                             | sp Q9P2S2   | 62   | 184865 | 166.39  | [3]      |
| Complement C1s subcomponent                  | sp P09871   | 1046 | 76635  | 163.60  |          |
| Ig lambda chain V-III region SH              | sp P01714   | 80   | 11386  | 160.25  |          |
| Complement component C6                      | sp P13671   | 480  | 104718 | 151.22  | [12]     |
| Ig kappa chain C region                      | sp P01834   | 1607 | 11602  | 109.59  |          |
| Ig gamma-2 chain C region                    | sp P01859   | 1131 | 35878  | 90.07   |          |

|                                                              |              |      |        |       |      |
|--------------------------------------------------------------|--------------|------|--------|-------|------|
| Isoform 15 of Fibronectin                                    | sp P02751-15 | 8651 | 272150 | 89.01 |      |
| Hornerin                                                     | sp Q86YZ3    | 40   | 282228 | 82.95 |      |
| NELL2                                                        | tr F8VVB6    | 1143 | 85863  | 77.62 | [13] |
| Ig lambda chain V-IV region Bau                              | sp P01715    | 37   | 11298  | 75.91 |      |
| Complement C3                                                | sp P01024    | 6034 | 187030 | 75.35 | [3]  |
| ROBO1 protein                                                | tr B2RXI1    | 373  | 175727 | 58.46 | [14] |
| Angiotensinogen                                              | sp P01019    | 356  | 53121  | 50.00 | [11] |
| Brevican (Fragment)                                          | tr Q5T3I6    | 59   | 24898  | 42.99 | [15] |
| Contactin-associated protein-like 4                          | tr F5H107    | 109  | 139833 | 40.66 |      |
| Ig kappa chain V-III region SIE                              | sp P01620    | 423  | 11768  | 39.88 |      |
| Collagen alpha-1(I) chain                                    | sp P02452    | 296  | 138857 | 36.11 | [3]  |
| Ig kappa chain V-III region VG (Fragment)                    | sp P04433    | 68   | 12567  | 34.66 |      |
| Serpin peptidase inhibitor, clade G (C1 inhibitor), member 1 | tr B4E1F0    | 1302 | 55734  | 32.35 |      |
| Fibrinogen $\gamma$ chain, isoform $\gamma$ -A               | sp P02679-2  | 820  | 49465  | 31.76 | [11] |
| Ig heavy chain V-III region BRO                              | sp P01766    | 738  | 13218  | 30.96 |      |
| Uncharacterized protein                                      | tr C9IZD4    | 180  | 141319 | 30.03 |      |
| Ig kappa chain V-I region AG                                 | sp P01593    | 182  | 11985  | 29.66 |      |
| NEO1 protein                                                 | tr B7ZKM9    | 755  | 154207 | 28.96 |      |
| Contactin-1, isoform 2                                       | sp Q12860-2  | 1846 | 111796 | 27.81 | [3]  |
| CSPG3 variant protein (Fragment)                             | tr Q4LE67    | 1200 | 144552 | 26.99 |      |
| Isoform 2 of Sulphydryl oxidase 1                            | sp O00391-2  | 36   | 66818  | 26.00 |      |
| Collagen, type III, alpha 1                                  | tr E7ENY8    | 85   | 111928 | 24.15 |      |
| IgGFc-binding protein                                        | sp Q9Y6R7    | 209  | 571639 | 24.11 |      |
| Ig heavy chain V-III region TUR                              | sp P01779    | 593  | 12423  | 23.27 |      |
| Beta-2-glycoprotein 1                                        | sp P02749    | 54   | 38273  | 23.06 | [16] |
| Collagen, type I, alpha 2                                    | tr F5H299    | 116  | 129445 | 22.22 | [9]  |

|                                               |             |      |        |       |      |
|-----------------------------------------------|-------------|------|--------|-------|------|
| Alpha-1-antitrypsin                           | sp P01009   | 1340 | 46707  | 21.44 | [11] |
| Prothrombin                                   | sp P00734   | 122  | 69992  | 21.03 | [9]  |
| Amyloid beta (A4) precursor protein           | tr B4DII8   | 918  | 84468  | 20.11 |      |
| Complement C4-B                               | sp P0C0L5   | 2358 | 192673 | 18.65 |      |
| Complement component C4B (Chido blood group)  | tr A2BHY4   | 2445 | 192677 | 18.52 |      |
| Neurexin-3-alpha                              | sp Q9Y4C0   | 465  | 180484 | 16.19 |      |
| Isoform 2 of Transmembrane protein 132A       | sp Q24JP5-2 | 524  | 110128 | 16.19 |      |
| Neural cell adhesion molecule L1-like protein | sp O00533   | 1545 | 134987 | 16.11 |      |
| Netrin receptor DCC                           | sp P43146   | 445  | 158357 | 15.60 |      |
| Neurofascin                                   | tr F8W791   | 370  | 148313 | 15.39 |      |
| Contactin-2                                   | sp Q02246   | 531  | 113322 | 15.27 |      |
| Vasorin                                       | sp Q6EMK4   | 176  | 71668  | 14.69 |      |
| Histidine-rich glycoprotein                   | sp P04196   | 227  | 59541  | 13.54 |      |
| Seizure related 6 homolog (Mouse)-like        | tr B0QYH4   | 304  | 79590  | 13.50 |      |
| Isoform 2 of Nidogen-1                        | sp P14543-2 | 154  | 121941 | 12.80 |      |
| Collagen alpha-1(VI) chain                    | sp P12109   | 128  | 108462 | 12.69 |      |
| Ceruloplasmin                                 | sp P00450   | 2332 | 122128 | 12.68 |      |
| L1 cell adhesion molecule, isoform CRA_a      | tr G3XAF4   | 135  | 138821 | 12.33 |      |
| Inter-alpha (Globulin) inhibitor H2           | tr Q5T985   | 624  | 105150 | 11.75 |      |
| Ig alpha-1 chain C region                     | sp P01876   | 630  | 37631  | 10.88 |      |
| Mannosidase, alpha, class 2A, member 2        | tr H0YKU9   | 79   | 120701 | 10.86 |      |
| Neural cell adhesion molecule 2               | sp O15394   | 782  | 92988  | 10.59 |      |
| Apolipoprotein A-I                            | sp P02647   | 152  | 30759  | 10.09 |      |
| Phospholipid transfer protein                 | tr B3KUE5   | 59   | 56598  | 9.10  |      |
| Uncharacterized protein                       | tr F5H7E1   | 746  | 72076  | 8.95  |      |
| Isoform 2 of Ig mu chain C region             | sp P01871-2 | 127  | 51758  | 8.93  |      |

|                                                                                                    |             |      |        |      |
|----------------------------------------------------------------------------------------------------|-------------|------|--------|------|
| Cystatin-C                                                                                         | sp P01034   | 164  | 15789  | 8.53 |
| Cartilage oligomeric matrix protein                                                                | tr G3XAP6   | 21   | 79646  | 8.45 |
| V-abl Abelson murine leukemia viral oncogene homolog 2                                             | tr D1MPS6   | 22   | 124482 | 8.14 |
| Serpin peptidase inhibitor, clade A (Alpha-1 antiproteinase, antitrypsin), member 3, isoform CRA_b | tr G3V5I3   | 377  | 50566  | 7.98 |
| Prostaglandin D2 synthase 21kDa (brain) (Fragment)                                                 | tr H0Y5A1   | 679  | 22932  | 7.49 |
| Cell surface glycoprotein MUC18                                                                    | sp P43121   | 118  | 71563  | 7.41 |
| Isoform 2 of Neural cell adhesion molecule 1                                                       | sp P13591-1 | 1240 | 93303  | 7.09 |
| Pigment epithelium-derived factor                                                                  | sp P36955   | 276  | 46283  | 6.84 |
| Seizure-related 6 homolog (mouse) (Fragment)                                                       | tr F5GZF9   | 438  | 98380  | 6.64 |
| Protein Shroom3                                                                                    | sp Q8TF72   | 64   | 216724 | 5.03 |
| Protease, serine, 1 (trypsin 1)                                                                    | tr E7EQ64   | 66   | 28105  | 4.82 |
| Kininogen 1                                                                                        | tr B4DPP8   | 35   | 46467  | 4.75 |
| Calcium channel, voltage-dependent, alpha 2/delta subunit 1                                        | tr F8WC36   | 1117 | 125311 | 4.47 |
| Neuronal cell adhesion molecule                                                                    | tr E9PDA4   | 1027 | 131662 | 3.79 |
| Apolipoprotein E                                                                                   | sp P02649   | 525  | 36132  | 3.49 |
| Laminin subunit gamma-1                                                                            | sp P11047   | 180  | 177489 | 2.95 |
| Vitronectin                                                                                        | sp P04004   | 34   | 54271  | 2.63 |
| Hemopexin                                                                                          | sp P02790   | 102  | 51643  | 2.23 |
| CD163 molecule                                                                                     | tr F5GZZ9   | 206  | 120244 | 2.21 |
| Lumican                                                                                            | sp P51884   | 62   | 38405  | 2.02 |
| Serotransferrin                                                                                    | sp P02787   | 4179 | 77014  | 1.22 |
| Plexin domain-containing 2                                                                         | tr F5H554   | 63   | 58147  | 1.06 |
| Delta and Notch-like epidermal growth factor-related receptor                                      | sp Q8NFT8   | 95   | 78422  | 0.59 |
| Serum albumin                                                                                      | sp P02768   | 8436 | 69321  | 0.57 |

|                                          |             |     |       |      |
|------------------------------------------|-------------|-----|-------|------|
| SPARC-like 1 (hevin)                     | tr B4E2Z0   | 233 | 61722 | 0.57 |
| Seizure-related 6 homolog (mouse)-like 2 | tr F5H293   | 425 | 94410 | 0.50 |
| Afamin                                   | sp P43652   | 223 | 69024 | 0.26 |
| Dermcidin isoform 2                      | tr A5JHP3   | 257 | 12406 | 0.20 |
| Isoform 2 of Peptidase inhibitor 16      | sp Q6UXB8-2 | 75  | 29654 | 0.07 |

Accession, accession number in SwissProt/Tremble data base; Score, Mascot Score; R, mass spectrometry signal intensity ratio  $I_{\text{column-bound}}/I_{\text{depleted}}$ ; Reference, reference suggesting eligibility as a biomarker

#### Reference List

1. Cooksley-Decasper S, Reiser H, Thommen DS, Biedermann B, Neidhart M, Gawinecka J *et al.* Antibody Phage Display Assisted Identification of Junction Plakoglobin as a Potential Biomarker for Atherosclerosis. PLoS ONE. 2012;7:e47985.
2. Hasselblatt M, Bohm C, Tatenhorst L, Dinh V, Newrzella D, Keyvani K *et al.* Identification of novel diagnostic markers for choroid plexus tumors - A microarray-based approach. Am J Surg Pathol. 2006;30:66-74.
3. Noben JP, Dumont D, Kwasnikowska N, Verhaert P, Somers V, Hupperts R *et al.* Lumbar cerebrospinal fluid proteome in multiple sclerosis: Characterization by ultrafiltration, liquid chromatography, and mass spectrometry. J Proteome Res. 2006;5:1647-57.
4. Tanaka M, Kikuchi H, Ishizu T, Minohara M, Osoegawa M, Motornura K *et al.* Intrathecal upregulation of granulocyte colony stimulating factor and its neuroprotective actions on motor neurons in amyotrophic lateral sclerosis. J Neuropath Exp Neur. 2006;65:816-25.
5. Blum-Degen D, Muller T, Kuhn W, Gerlach M, Przuntek H, Riederer P. Interleukin-1 beta and interleukin-6 are elevated in the cerebrospinal fluid of Alzheimer's and de novo Parkinson's disease patients. Neurosci Lett. 1995;202:17-20.
6. Kroksveen AC, Opsahl JA, Aye TT, Ulvik RJ, Berven FS. Proteomics of human cerebrospinal fluid: Discovery and verification of biomarker candidates in neurodegenerative diseases using quantitative proteomics. J Proteomics. 2011;74:371-88.

7. Hammack BN, Fung KYC, Hunsucker SW, Duncan MW, Burgoon MP, Owens GP *et al.* Proteomic analysis of multiple sclerosis cerebrospinal fluid. *Mult Scler.* 2004;10:245-60.
8. Yoshioka T, Kurokawa M, Sato T, Nagai K, Iizuka N, Arito M *et al.* Protein profiles of peripheral blood mononuclear cells as a candidate biomarker for Behcet's disease. *Clin Exp Rheumatol.* 2014;32:S9-S19.
9. Abdi F, Quinn JF, Jankovic J, McIntosh M, Leverenz JB, Peskind E *et al.* Detection of biomarkers with a multiplex quantitative proteomic platform in cerebrospinal fluid of patients with neurodegenerative disorders. *J Alzheimers Dis.* 2006;9:293-348.
10. Whiteaker JR, Zhang H, Zhao L, Wang P, Kelly-Spratt KS, Ivey RG *et al.* Integrated pipeline for mass spectrometry-based discovery and confirmation of biomarkers demonstrated in a mouse model of breast cancer. *J Proteome Res.* 2007;6:3962-75.
11. Yin GN, Lee HW, Cho JY, Suk K. Neuronal pentraxin receptor in cerebrospinal fluid as a potential biomarker for neurodegenerative diseases. *Brain Res.* 2009;1265:158-70.
12. Schrag M, McAuley G, Pomakian J, Jiffry A, Tung S, Mueller C *et al.* Correlation of hypointensities in susceptibility-weighted images to tissue histology in dementia patients with cerebral amyloid angiopathy: a postmortem MRI study. *Acta Neuropathol.* 2010;119:291-302.
13. Roy S, Josephson SA, Fridlyand J, Karch J, Kadoch C, Karrim J *et al.* Protein biomarker identification in the CSF of patients with CNS lymphoma. *J Clin Oncol.* 2008;26:96-105.
14. Parray A, Siddique HR, Kuriger JK, Mishra SK, Rhim JS, Nelson HH *et al.* ROBO1, a tumor suppressor and critical molecular barrier for localized tumor cells to acquire invasive phenotype: Study in African-American and Caucasian prostate cancer models. *Int J Cancer.* 2014;135:2493-506.
15. Comabella M, Fernandez M, Martin R, Rivera-Vallve S, Borrás E, Chiva C *et al.* Cerebrospinal fluid chitinase 3-like 1 levels are associated with conversion to multiple sclerosis. *Brain.* 2010;133:1082-93.
16. Gao Y, Wu K, Xu Y, Zhou H, He W, Zhang W *et al.* Characterization of Acute Renal Allograft Rejection by Human Serum Proteomic Analysis. *J Huazhong Univ Sci Technol Med Sci.* 2009;29:585-91.
