# Supplementary material for: Depletion of highly abundant proteins from human cerebrospinal fluid: a cautionary note
Source: Springer Nature journal article supplement (doi:10.1186/s13024-015-0050-7), 2015-10-15
Supplement: MOESM4 [file 9776500]

**Title:** Depletion of highly abundant proteins from human cerebrospinal fluid: a cautionary note

**Journal:** Molecular Neurodegeneration

**Authors:** Ramona Günther, Eberhard Krause, Michael Schümann, Ingolf E. Blasig, Reiner F. Haseloff

**Corresponding author:** Reiner F. Haseloff, Leibniz Institute of Molecular Pharmacology, Robert-Roessle-Str. 10, D-13125 Berlin, Germany;  
email, [haseloff@fmp-berlin.de](mailto:haseloff@fmp-berlin.de)

Supplementary Table 2: Proteins co-depleted in eluate/flow-through fractions obtained by antibody/protein G-based albumin/Ig depletion of human cerebrospinal fluid

| <b>Protein</b>            | <b>Accession</b> | <b>Score</b> | <b>Mass (Da)</b> | <b>R</b> | <b>Reference</b> |
|---------------------------|------------------|--------------|------------------|----------|------------------|
| Coagulation factor XII    | sp P00748        | 40           | 67748            | 124.37   | [1]              |
| Desmoglein 1              | sp Q02413        | 393          | 113676           | 78.16    | [2]              |
| Lactotransferrin          | tr B7Z4X2        | 110          | 73114            | 36.96    | [3]              |
| Calmodulin-like protein 5 | sp Q9NZT1        | 93           | 15883            | 29.72    | [2]              |
| Collagen alpha-1(I) chain | sp P02452        | 377          | 138857           | 9.57     | [2]              |
| Protein Shroom3           | sp Q8TF72        | 63           | 216724           | 4.26     | [4]              |
| Collagen, type I, alpha 2 | tr F5H299        | 398          | 129445           | 3.93     | [5]              |

|                                                |             |      |        |      |     |
|------------------------------------------------|-------------|------|--------|------|-----|
| Protease, serine, 1 (trypsin 1)                | tr E7EQ64   | 70   | 28105  | 3.53 |     |
| Uncharacterized protein                        | tr F8WES6   | 179  | 13100  | 2.65 |     |
| ATPase family AAA domain-containing protein 3C | sp Q5T2N8   | 45   | 46350  | 2.37 |     |
| Ig kappa chain C region                        | sp P01834   | 628  | 11602  | 1.07 |     |
| Ig gamma-1 chain C region                      | sp P01857   | 1738 | 36083  | 1.02 |     |
| Ig gamma-2 chain C region                      | sp P01859   | 1381 | 35878  | 0.98 |     |
| Ig gamma-3 chain C region                      | sp P01860   | 1143 | 41260  | 0.93 |     |
| Complement factor H                            | sp P08603   | 1959 | 139005 | 0.81 | [6] |
| Ig kappa chain V-III region SIE                | sp P01620   | 249  | 11768  | 0.76 |     |
| Plasminogen                                    | sp P00747   | 1055 | 90510  | 0.74 | [2] |
| Immunoglobulin lambda-like polypeptide 5       | sp B9A064   | 189  | 23049  | 0.68 |     |
| Ig heavy chain V-III region BRO                | sp P01766   | 627  | 13218  | 0.67 |     |
| Ig lambda-2 chain C regions                    | sp P0CG05   | 283  | 11287  | 0.62 |     |
| Alpha-1-antitrypsin                            | sp P01009   | 2469 | 46707  | 0.61 | [6] |
| Ig kappa chain V-IV region Len                 | sp P01625   | 99   | 12632  | 0.55 |     |
| Isoform 2 of Calsyntenin-1                     | sp O94985-2 | 1752 | 108574 | 0.54 | [6] |
| Serum albumin                                  | sp P02768   | 6983 | 69321  | 0.51 |     |
| Isoform 2 of Nidogen-1                         | sp P14543-2 | 301  | 121941 | 0.51 |     |
| Complement component C6                        | sp P13671   | 644  | 104718 | 0.43 |     |

|                                                        |             |      |        |      |
|--------------------------------------------------------|-------------|------|--------|------|
| Isoform 2 of Reelin                                    | sp P78509-2 | 518  | 387951 | 0.38 |
| Apolipoprotein A-I                                     | sp P02647   | 285  | 30759  | 0.29 |
| Isoform 2 of Cartilage acidic protein 1                | sp Q9NQ79-2 | 79   | 70389  | 0.24 |
| Complement factor B                                    | tr B4E1Z4   | 2052 | 140853 | 0.24 |
| Cystatin-C                                             | sp P01034   | 95   | 15789  | 0.23 |
| Serpin peptidase inhibitor, clade A, member 3, isoform |             |      |        |      |
| CRA_b                                                  | tr G3V5I3   | 2043 | 50566  | 0.23 |
| CSPG3 variant protein (Fragment)                       | tr Q4LE67   | 886  | 144552 | 0.23 |
| Isoform 2 of Ig mu chain C region                      | sp P01871-2 | 204  | 51758  | 0.23 |
| Complement C2                                          | sp P06681   | 457  | 83214  | 0.23 |
| Inter-alpha (Globulin) inhibitor H2                    | tr Q5T985   | 937  | 105150 | 0.21 |
| Gelsolin                                               | sp P06396   | 2274 | 85644  | 0.21 |
| Prothrombin                                            | sp P00734   | 156  | 69992  | 0.21 |
| Neurexin 1                                             | tr F5GYC7   | 1100 | 164607 | 0.21 |
| Uncharacterized protein                                | tr F5H7E1   | 571  | 72076  | 0.20 |
| Vitronectin                                            | sp P04004   | 29   | 54271  | 0.19 |
| Prostaglandin D2 synthase 21kDa (brain) (Fragment)     | tr H0Y5A1   | 1040 | 22932  | 0.18 |
| Fibulin-1                                              | sp P23142   | 2116 | 77162  | 0.18 |
| Ig alpha-1 chain C region                              | sp P01876   | 1127 | 37631  | 0.17 |

|                                                              |             |      |        |      |
|--------------------------------------------------------------|-------------|------|--------|------|
| Protein tyrosine phosphatase, receptor type, S               | tr H0YG31   | 175  | 174506 | 0.17 |
| Pigment epithelium-derived factor                            | sp P36955   | 900  | 46283  | 0.17 |
| Complement component C4B (Childo blood group)                | tr A2BHY4   | 2818 | 192677 | 0.16 |
| Ceruloplasmin                                                | sp P00450   | 5870 | 122128 | 0.16 |
| Complement C3                                                | sp P01024   | 6867 | 187030 | 0.16 |
| Coagulation factor V                                         | sp P12259   | 477  | 251546 | 0.15 |
| Complement C1r subcomponent                                  | sp P00736   | 748  | 80067  | 0.15 |
| Isoform 2 of Sulphydryl oxidase 1                            | sp O00391-2 | 222  | 66818  | 0.15 |
| NEO1 protein                                                 | tr B7ZKM9   | 1205 | 154207 | 0.14 |
| Collagen alpha-1(VI) chain                                   | sp P12109   | 426  | 108462 | 0.14 |
| Ectonucleotide pyrophosphatase/phosphodiesterase 2           | tr E7EUF1   | 1167 | 101488 | 0.14 |
| EGF containing fibulin-like extracellular matrix protein 1   | tr B4DW75   | 57   | 39169  | 0.14 |
| Semaphorin-7A                                                | sp O75326   | 273  | 74776  | 0.13 |
| Kallikrein B, plasma (Fletcher factor) 1 (Fragment)          | tr H0YAC1   | 189  | 76834  | 0.13 |
| Lumican                                                      | sp P51884   | 323  | 38405  | 0.12 |
| Complement component 4A (Rodgers blood group)                | tr B0UZ83   | 2792 | 192754 | 0.12 |
| L1 cell adhesion molecule, isoform CRA_a                     | tr G3XAF4   | 285  | 138821 | 0.12 |
| Vitamin K-dependent protein S                                | sp P07225   | 323  | 75074  | 0.11 |
| Serpin peptidase inhibitor, clade G (C1 inhibitor), member 1 | tr B4E1F0   | 2208 | 55734  | 0.11 |

|                                                             |             |       |        |      |
|-------------------------------------------------------------|-------------|-------|--------|------|
| Apolipoprotein E                                            | sp P02649   | 1340  | 36132  | 0.10 |
| Isoform 2 of Transmembrane protein 132A                     | sp Q24JP5-2 | 446   | 110128 | 0.10 |
| Contactin-2                                                 | sp Q02246   | 1619  | 113322 | 0.10 |
| Hemopexin                                                   | sp P02790   | 894   | 51643  | 0.09 |
| Alpha-2-macroglobulin                                       | tr H0YGH4   | 10961 | 164837 | 0.09 |
| Hornerin                                                    | sp Q86YZ3   | 27    | 282228 | 0.09 |
| IgGfc-binding protein                                       | sp Q9Y6R7   | 548   | 571639 | 0.09 |
| Calcium channel, voltage-dependent, alpha 2/delta subunit 1 | tr F8WC36   | 2846  | 125311 | 0.09 |
| Isoform 2 of Neural cell adhesion molecule 1                | sp P13591-1 | 3584  | 93303  | 0.08 |
| Kinesin-like protein KIF14                                  | sp Q15058   | 20    | 186375 | 0.08 |
| Plexin domain-containing 2                                  | tr F5H554   | 147   | 58147  | 0.08 |
| Phospholipid transfer protein                               | tr B3KUE5   | 344   | 56598  | 0.08 |
| Neural cell adhesion molecule 2                             | sp O15394   | 1002  | 92988  | 0.07 |
| Alpha-1B-glycoprotein                                       | sp P04217   | 483   | 54220  | 0.07 |
| Complement component C7                                     | sp P10643   | 1201  | 93457  | 0.07 |
| Neuronal cell adhesion molecule                             | tr E9PDA4   | 3131  | 131662 | 0.07 |
| Activated leukocyte cell adhesion molecule                  | tr F5GXJ9   | 138   | 59491  | 0.06 |
| Contactin 6                                                 | tr F5H752   | 329   | 105771 | 0.06 |
| Cell surface glycoprotein MUC18                             | sp P43121   | 505   | 71563  | 0.06 |

|                                                                  |             |      |        |      |
|------------------------------------------------------------------|-------------|------|--------|------|
| Neurofascin                                                      | tr F8W791   | 940  | 148313 | 0.06 |
| Contactin-3                                                      | sp Q9P232   | 285  | 112812 | 0.06 |
| Inter-alpha-trypsin inhibitor heavy chain family, member 4       | tr E9PGN5   | 2350 | 99795  | 0.05 |
| Histidine-rich glycoprotein                                      | sp P04196   | 653  | 59541  | 0.05 |
| Group-specific component (vitamin D-binding protein)             | tr D6RAK8   | 256  | 55041  | 0.05 |
| Isoform 2 of Amyloid-like protein 1                              | sp P51693-2 | 1269 | 72202  | 0.05 |
| Serotransferrin                                                  | sp P02787   | 8978 | 77014  | 0.04 |
| Delta and Notch-like epidermal growth factor-related<br>receptor | sp Q8NFT8   | 142  | 78422  | 0.04 |
| Neural cell adhesion molecule L1-like protein                    | sp O00533   | 2769 | 134987 | 0.04 |
| Seizure-related 6 homolog (mouse)-like 2                         | tr F5H293   | 803  | 94410  | 0.04 |
| Vascular cell adhesion molecule 1                                | tr E9PDD1   | 492  | 74299  | 0.04 |
| Uncharacterized protein                                          | tr C9IZD4   | 664  | 141319 | 0.03 |
| Kininogen 1                                                      | tr B4DPP8   | 463  | 46467  | 0.03 |
| Cadherin 6, type 2, K-cadherin (fetal kidney)                    | tr D6RF86   | 226  | 67361  | 0.03 |
| Amyloid-like protein 1                                           | sp P51693   | 1241 | 72131  | 0.03 |
| CD163 molecule                                                   | tr F5GZZ9   | 672  | 120244 | 0.02 |
| Peptidase inhibitor 16                                           | sp Q6UXB8   | 167  | 49440  | 0.02 |
| Afamin                                                           | sp P43652   | 589  | 69024  | 0.02 |

|                                              |             |     |       |      |
|----------------------------------------------|-------------|-----|-------|------|
| Isoform 4 of Extracellular matrix protein 1  | sp Q16610-4 | 150 | 63523 | 0.01 |
| Dickkopf 3 homolog ( <i>Xenopus laevis</i> ) | tr F6SYF8   | 651 | 39924 | 0.01 |
| Cadherin 13, H-cadherin (heart)              | tr C9JRI6   | 297 | 78253 | 0.01 |

Accession, accession number in SwissProt/Tremble data base; Score, Mascot Score; R, mass spectrometry signal intensity ratio  $I_{\text{column-bound}}/I_{\text{depleted}}$ ; Reference, reference suggesting eligibility as a biomarker

#### Reference List

1. Kraft P, De Meyer S.F., Kleinschnitz C. Next-generation antithrombotics in ischemic stroke: preclinical perspective on 'bleeding-free antithrombosis'. *J Cereb Blood Flow Metab.* 2012;32:1831-40.
2. Noben JP, Dumont D, Kwasnikowska N, Verhaert P, Somers V, Hupperts R *et al.* Lumbar cerebrospinal fluid proteome in multiple sclerosis: Characterization by ultrafiltration, liquid chromatography, and mass spectrometry. *J Proteome Res.* 2006;5:1647-57.
3. Fillebeen C, Ruchoux MM, Mitchell V, Vincent S, Benaissa M, Pierce A. Lactoferrin is synthesized by activated microglia in the human substantia nigra and its synthesis by the human microglial CHME cell line is upregulated by tumor necrosis factor alpha or 1-methyl-4-phenylpyridinium treatment. *Mol Brain Res.* 2001;96:103-13.
4. Aarhus M, Helland C.A., Lund-Johansen M, Wester K, Knappskog PM. Microarray-based gene expression profiling and DNA copy number variation analysis of temporal fossa arachnoid cysts. *Cerebrospinal Fluid Res.* 2010;7:6.
5. Abdi F, Quinn JF, Jankovic J, McIntosh M, Leverenz JB, Peskind E *et al.* Detection of biomarkers with a multiplex quantitative proteomic platform in cerebrospinal fluid of patients with neurodegenerative disorders. *J Alzheimers Dis.* 2006;9:293-348.
6. Yin GN, Lee HW, Cho JY, Suk K. Neuronal pentraxin receptor in cerebrospinal fluid as a potential biomarker for neurodegenerative diseases. *Brain Res.* 2009;1265:158-70.
